# Supplementary material for: Successful Inclusion of High Vegetable Protein Sources in Feed for Rainbow Trout without Decrement in Intestinal Health
Source: MDPI journal article supplement (doi:10.3390/ani11123577), 2021-12-16
Supplement: s1 [file s1]

**Supplementary Table S2.** Results from BestKeeper program analysis.

|                         | <i><math>\beta</math>-actin</i> | <i>ELF-1<math>\alpha</math></i> |
|-------------------------|---------------------------------|---------------------------------|
| N                       | 92                              | 92                              |
| geo Mean [Ct]           | 18.54                           | 18.12                           |
| Mean [Ct]               | 18.56                           | 18.15                           |
| min [Ct]                | 17.30                           | 15.41                           |
| max [Ct]                | 20.99                           | 20.03                           |
| std dev [ $\pm$ Ct]     | 0.51                            | 0.72                            |
| CV [% Ct]               | 2.74                            | 3.99                            |
| min [x-fold]            | -2.37                           | -6.54                           |
| max [x-fold]            | 5.45                            | 3.75                            |
| std dev [ $\pm$ x-fold] | 1.42                            | 1.65                            |
| coeff. of corr. [r]     | 0.885                           | 0.942                           |
