# Supplementary material for: Successful Inclusion of High Vegetable Protein Sources in Feed for Rainbow Trout without Decrement in Intestinal Health
Source: MDPI journal article supplement (doi:10.3390/ani11123577), 2021-12-16
Supplement: s1 [file s1]

**Supplementary Table S1.** Amino acid profile of experimental diets expressed in g per 100 g of wet matter.

|                                        | FM0   | FM10 | FM20 |
|----------------------------------------|-------|------|------|
| <b>Amino acids (%wet weight)</b>       |       |      |      |
| <b><i>EAA</i><sup>1</sup> g / 100g</b> |       |      |      |
| <i>Histidine</i>                       | 1.32  | 0.87 | 1.04 |
| <i>Arginine</i>                        | 6.52  | 2.99 | 3.22 |
| <i>Valine</i>                          | 2.33  | 1.59 | 1.74 |
| <i>Methionine</i>                      | 0.70  | 0.67 | 0.54 |
| <i>Lysine</i>                          | 2.90  | 2.74 | 2.14 |
| <i>Isoleucine</i>                      | 1.88  | 1.35 | 1.47 |
| <i>Leucine</i>                         | 3.25  | 2.32 | 2.55 |
| <i>Phenylalanine</i>                   | 2.12  | 1.34 | 1.55 |
| <i>Threonine</i>                       | 1.79  | 1.22 | 1.41 |
| <b><i>NEAA</i><sup>2</sup></b>         |       |      |      |
| <i>Aspartic</i>                        | 4.12  | 3.08 | 3.13 |
| <i>Serine</i>                          | 2.77  | 1.79 | 1.96 |
| <i>Glutamic</i>                        | 13.94 | 9.77 | 9.53 |
| <i>Glycine</i>                         | 2.17  | 1.61 | 1.94 |
| <i>Alanine</i>                         | 1.75  | 1.42 | 1.60 |
| <i>Proline</i>                         | 4.60  | 3.36 | 3.53 |
| <i>Cysteine</i>                        | 0.65  | 0.73 | 0.53 |
| <i>Tyrosine</i>                        | 1.42  | 0.89 | 1.00 |
